# Supplementary material for: The PCP effector Fuzzy controls cilial assembly and signaling by recruiting Rab8 and Dishevelled to the primary cilium
Source: PubMed Central journal article supplement — Mol Biol Cell. 2013 Mar 1;24(5):555–65. doi: 10.1091/mbc.E12-06-0437 (PMC3583660; doi:10.1091/mbc.e12-06-0437), 2013-03-01
Supplement: supp_E12-06-0437v1_CombinedSupMats.pdf [file supp_E12-06-0437v1_CombinedSupMats.pdf]

**Supplementary Figure 1. Characterization of Fuzzy<sup>GFP</sup> protein subcellular localization.** Non-confluent unciliated MDCK cells stably expressing Fuzzy<sup>GFP</sup> cDNA form GFP+ intracellular vesicles (green). Cells were stained with the antibodies against calreticulin (red, ER compartment), Sec23 (red, ER-Golgi compartment), GM130 (cis-Golgi compartment) and syntaxin 11 (trans-Golgi/late endosomal compartment); Fuzzy<sup>GFP</sup> is co-localized with syntaxin 11 (arrows), bar-5 $\mu$ m.

**Supplementary Figure 2. Loss of Fuzzy results in loss of Rab8 at the basal body.** *Upper panels:* In serum-starved MEFs<sup>+/+</sup>, endogenous Rab8 (red, detected with anti-Rab8 antibody) is localized to the basal body (green, visualized with anti- $\gamma$ -tubulin antibody, arrowhead) and cilium (red, arrow). *Lower panels:* In MEFs<sup>Fuz/Fuz</sup>, Rab8 (red, arrowhead) is not enriched at the basal body (green, arrowhead); bar -1 $\mu$ m.

**Supplementary Figure 3. Monolayers of MDCK cells stably expressing either GFP or Fuzzy-GFP protein.** *Upper image:* MDCK clone stably transfected with pEGFP expression vector. Cell boundaries are demarcated by staining with ZO-1 antibody (green). *Lower image:* MDCK cells stably transfected with Fuzzy-GFP expression vector. Cell boundaries are demarcated with anti-ZO-1 antibody (green). Fuzzy-GFP protein (green) can be seen in the basal bodies (arrowheads) or primary cilium (arrow).

**Supplementary Figure 4. Effect of Brefeldin A on subcellular Fuzzy co-localization.** *Upper panels:* Cherry-tagged Fuzzy (Fuzzy<sup>Cherry</sup>, red) co-localizes with the GFP-tagged TGN38 (TGN38<sup>GFP</sup>, green) marker of trans-Golgi network (arrows) in MDCK cells transiently co-transfected with both cDNAs. *Lower panels:* Transfected MDCK cells treated with BrefeldinA: Fuzzy<sup>Cherry</sup>, red; TGN38<sup>GFP</sup>, green. Fuzzy loses its vesicular appearance and both proteins are diffusely spread throughout the cell. Bars -10 $\mu$ m.

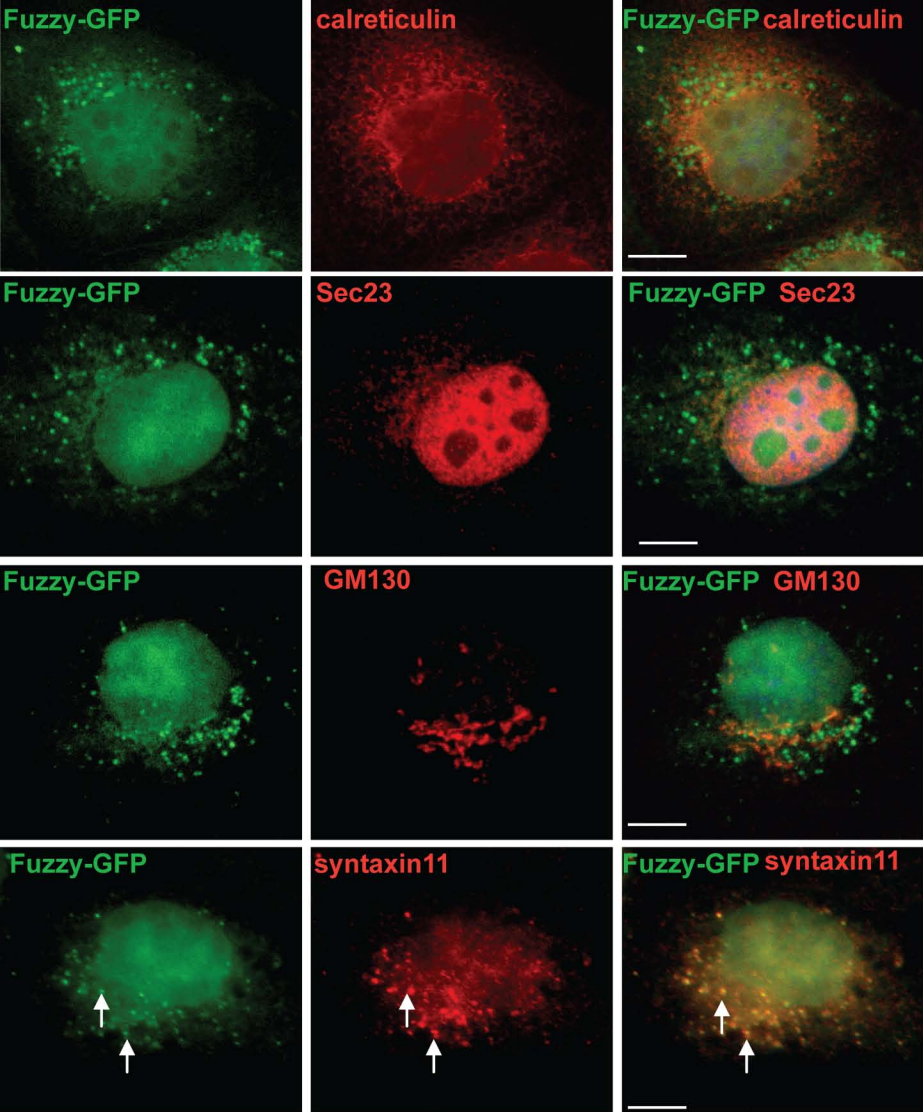

Supplementary Figure 1

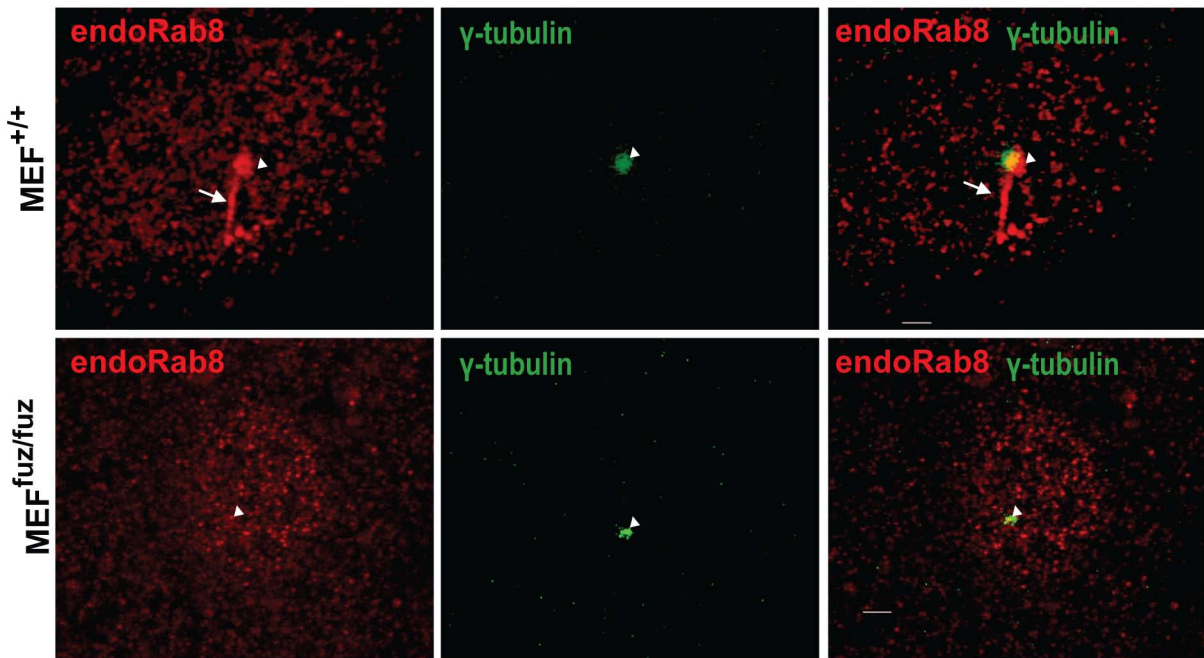

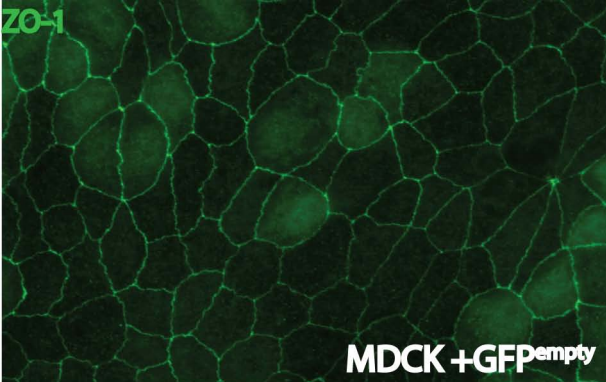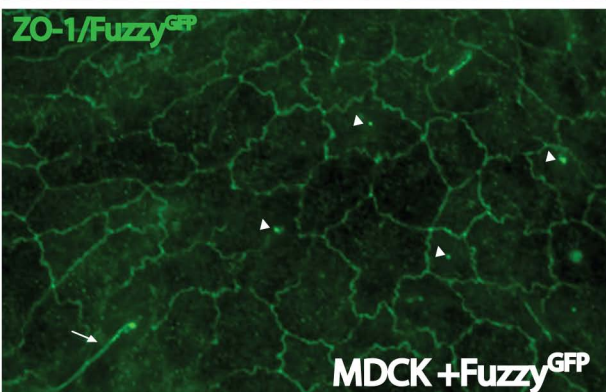

Supplementary Figure 3

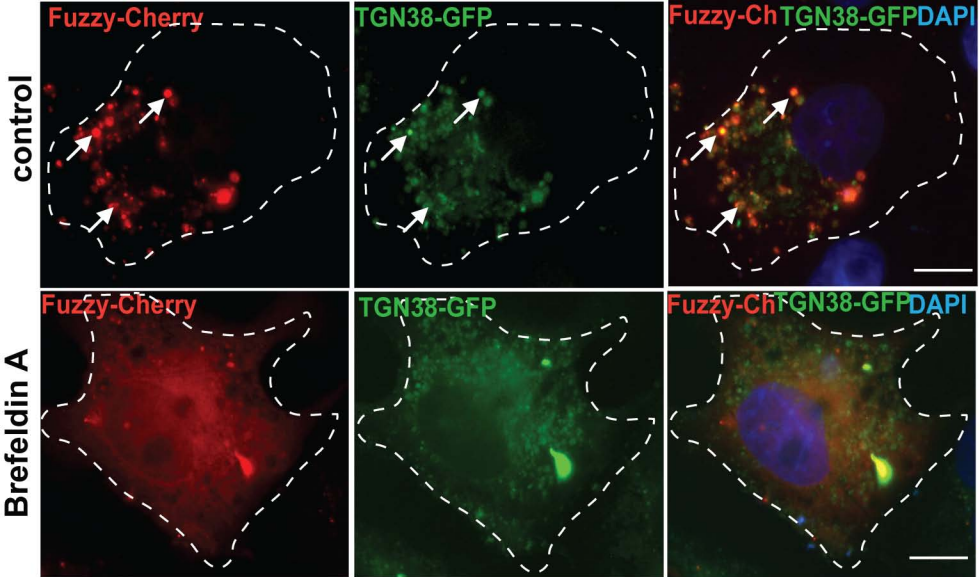

Supplementary Figure 4
